# Supplementary material for: Activity of La0.75Sr0.25Cr0.5Mn0.5O3−δ, Ni3Sn2and Gd-doped CeO2towards the reverse water-gas shift reaction and carburisation for a high-temperature H2O/CO2co-electrolysis
Source: Royal Society of Chemistry journal article supplement (doi:10.1039/d0ra00362j), 2020-01-01
Supplement: d0ra00362j1.pdf [file d0ra00362j1.pdf]

### Supplemental data

## Activity of LaSrCrMnO<sub>3</sub>, Ni<sub>3</sub>Sn<sub>2</sub> and Gd-doped CeO<sub>2</sub> towards reverse water-gas shift reaction and carburization for high-temperature H<sub>2</sub>O/CO<sub>2</sub> co-electrolysis

Nicky Bogolowski, Beatriz Sánchez Batalla, Baekkyoung Shin, Jean-Francois Drillet\*

DECHEMA-Forschungsinstitut

Theodor-Heuss-Allee 25

60486 Frankfurt a. M., Germany

\*Corresponding Author: J.-F. Drillet, drillet@dechema.de

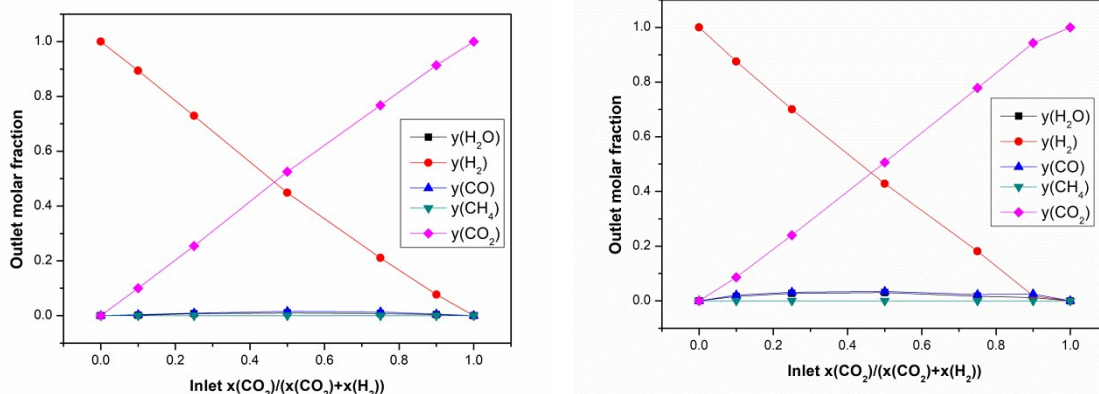

Figure S1. Blind test in the quartz glass tube reactor at 700 (left) and 800 °C (right) and 1 bar (see section 3.2.1). All reaction product concentrations including that of water vapour were evaluated by GC and humidity sensor, respectively.

Table S1: Product molar fractions for 3 H<sub>2</sub>:CO<sub>2</sub> feed gas compositions during blind test in quartz glass tube reactor at 700 & 800 °C and 1 bar from Figure S1.

| H <sub>2</sub> :CO <sub>2</sub> | Temperature / °C | y(H <sub>2</sub> O) | y(CO) | y(CH <sub>4</sub> ) |
|---------------------------------|------------------|---------------------|-------|---------------------|
| 0.75:0.25                       | 700              | 0.008               | 0.009 | 0                   |
| 0.5:0.5                         |                  | 0.010               | 0.016 | 0                   |
| 0.25:0.75                       |                  | 0.008               | 0.014 | 0                   |
| 0.75:0.25                       | 800              | 0.027               | 0.032 | 0                   |
| 0.5:0.5                         |                  | 0.030               | 0.035 | 0                   |
| 0.25:0.75                       |                  | 0.017               | 0.023 | 0                   |

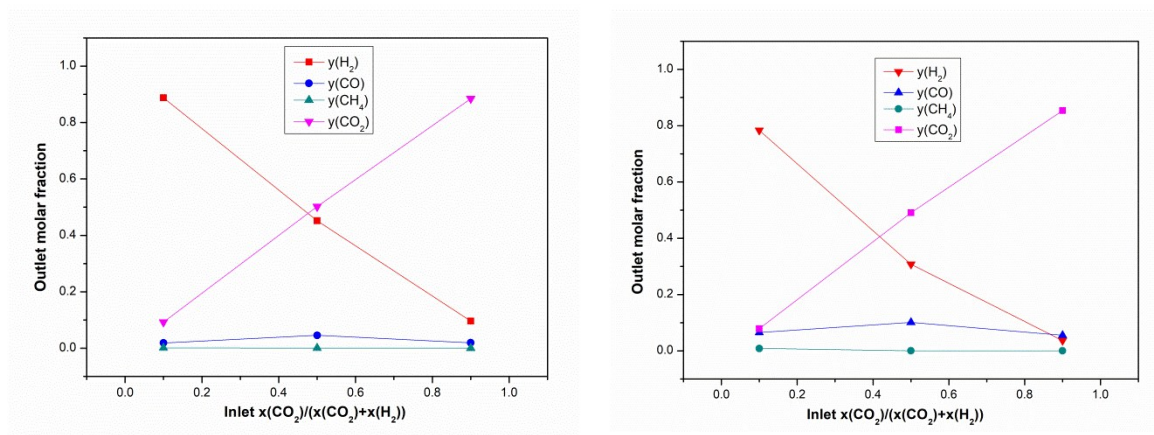

**Figure S2.** Blind test in the Ni-Cr tube reactor at 700 (left) and 800 °C (right) and 10 bar (see section 3.2.1). Reaction product concentrations were evaluated by GC. Since water content of the gas phase at reactor outlet was not measurable with humidity sensor at high pressure, molar fraction of H<sub>2</sub>O was assumed to be equal to that of CO.

**Table S2:** Product molar fractions for 3 H<sub>2</sub>:CO<sub>2</sub> feed gas compositions during blind test in Ni-Cr micro alloy tube reactor at 700 & 800 °C and 10 bar from Figure S2.

| H <sub>2</sub> :CO <sub>2</sub> | Temperature / °C | y(CO) | y(CH <sub>4</sub> ) |
|---------------------------------|------------------|-------|---------------------|
| 0.9:0.1                         |                  | 0.018 | 0.001               |
| 0.5:0.5                         | 700              | 0.044 | 0.0004              |
| 0.1:0.9                         |                  | 0.019 | 0                   |
| 0.9:0.1                         |                  | 0.065 | 0.008               |
| 0.5:0.5                         | 800              | 0.101 | 0                   |
| 0.1:0.9                         |                  | 0.055 | 0                   |

**Table S3: Mass of samples ( $\pm 0.01$  g) before and after exposure tests in NiCr tube reactor under different atmospheres and calculated mass change  $\Delta m$  in gram and percentage.**

| Exposure Test                                                                          | Catalyst                        | $m_{\text{before test}} / \text{g}$ | $m_{\text{after test}} / \text{g}$ | $\Delta m / \text{g}$ | $\Delta m / \%$ |
|----------------------------------------------------------------------------------------|---------------------------------|-------------------------------------|------------------------------------|-----------------------|-----------------|
| <b>H<sub>2</sub>:CO<sub>2</sub>:CH<sub>4</sub>:CO=0.7:0.1:0.1:0.1</b><br>700 °C, 3 bar | LSCrM                           | 0.501                               | 0.496                              | -0.005                | -1.00           |
|                                                                                        | Ni <sub>3</sub> Sn <sub>2</sub> | 2.703                               | 2.692                              | -0.011                | -0.41           |
|                                                                                        | GDC <sub>20</sub>               | 1.676                               | 1.662                              | -0.014                | -0.84           |
|                                                                                        | Ni                              | 2.108                               | 2.585                              | +0.477                | +22.63          |
| <b>H<sub>2</sub>:CO<sub>2</sub> = 0.9:0.1</b><br>800 °C, 10 bar                        | LSCrM                           | 0.501                               | 0.496                              | -0.005                | -1.00           |
|                                                                                        | Ni <sub>3</sub> Sn <sub>2</sub> | 1.825                               | 1.813                              | -0.012                | -0.66           |
|                                                                                        | GDC <sub>20</sub>               | 1.938                               | 1.919                              | -0.019                | -0.98           |
|                                                                                        | Ni                              | 2.283                               | 2.278                              | -0.005                | -0.22           |
| <b>H<sub>2</sub>:CO<sub>2</sub> = 0.5:0.5</b><br>700 °C, 10 bar                        | LSCrM                           | 0.503                               | 0.500                              | -0.003                | -0.60           |
|                                                                                        | Ni <sub>3</sub> Sn <sub>2</sub> | 1.843                               | 1.810                              | -0.033                | -1.79           |
|                                                                                        | GDC <sub>20</sub>               | 1.918                               | 1.897                              | -0.021                | -1.09           |
|                                                                                        | Ni                              | 2.126                               | 2.121                              | -0.005                | -0.24           |
| <b>H<sub>2</sub>:CO<sub>2</sub> = 0.1:0.9</b><br>700 °C, 10 bar                        | LSCrM                           | 0.511                               | 0.494                              | -0.017                | -3.33           |
|                                                                                        | Ni <sub>3</sub> Sn <sub>2</sub> | 1.655                               | 1.597                              | -0.058                | -3.50           |
|                                                                                        | GDC <sub>20</sub>               | 1.796                               | 1.783                              | -0.013                | -0.72           |
|                                                                                        | Ni                              | 2.206                               | 2.198                              | -0.008                | -0.36           |
